# Supplementary material
Source: publisher site journal article supplement (https://www.spandidos-publications.com/18/downloadSupplementary)

Figure S1. (A) PC-12 cells were collected upon Sal treatment at different concentrations for 1 h or for different times at 50  $\mu$ M. Effects of Sal on the protein expression levels of BCL-2 and Bax. (B) Quantification of BCL-2/Bax expression analysis by western blotting. Data are presented as the mean  $\pm$  standard deviation (n=3). \*P<0.05 and \*\*P<0.01. BCL-2, B-cell lymphoma 2; Bax, BCL-2-associated X protein; Sal, salidroside.

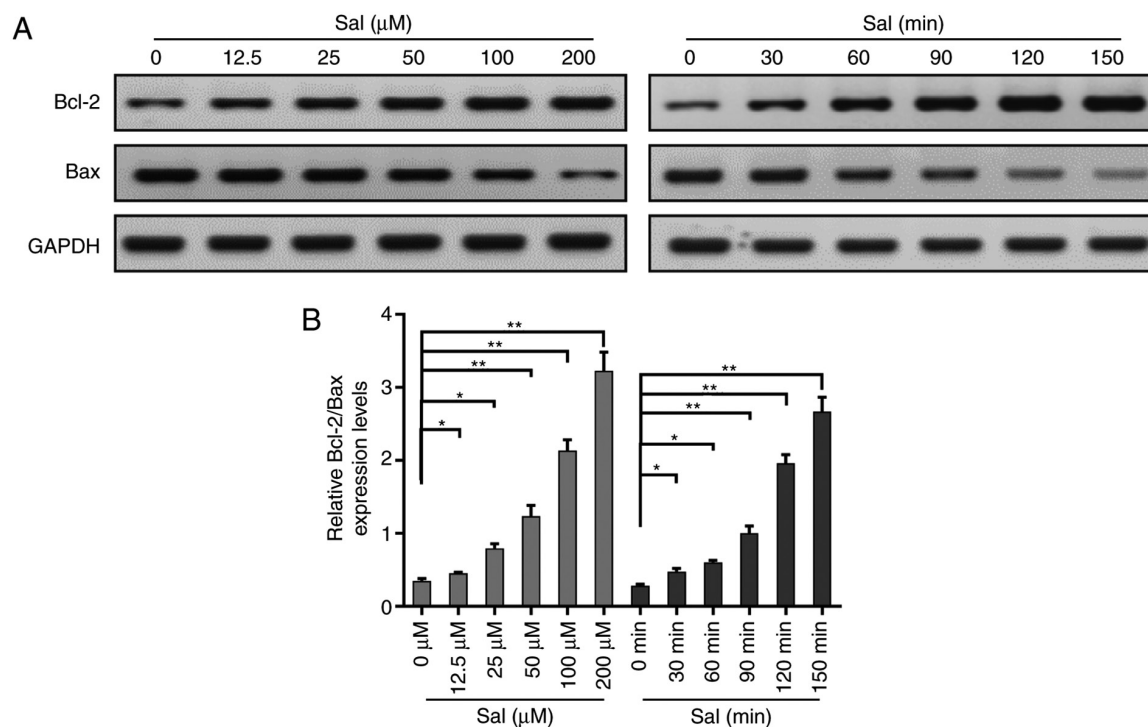

Supplement: Supplementary file 1 [file downloadSupplementary]
